# Supplementary material
Source: PubMed Central journal article supplement (PMC1637615)

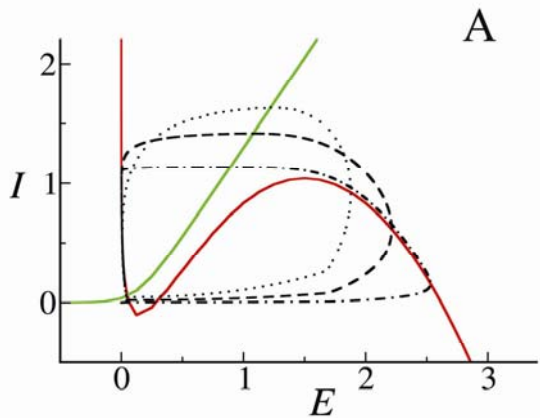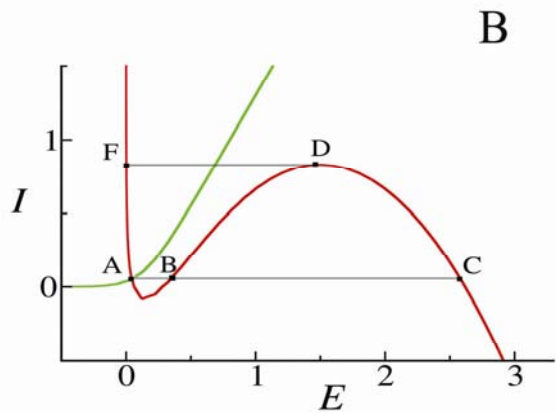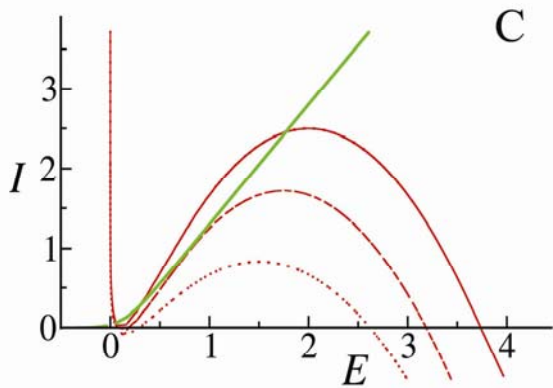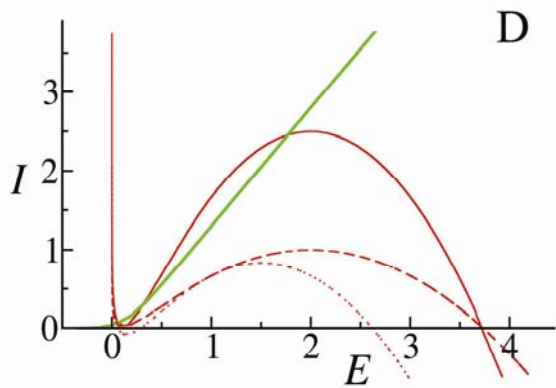

Supplement: pnas_0607589103_2.pdf [file pnas_0607589103_2.pdf]

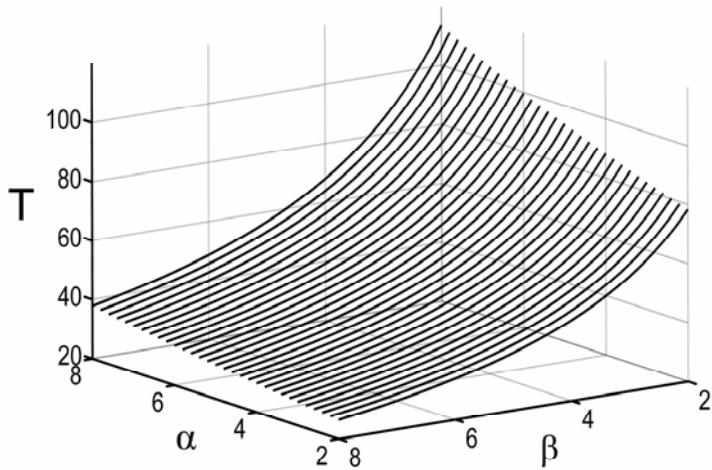

Supplement: pnas_0607589103_3.pdf [file pnas_0607589103_3.pdf]
